# Supplementary material for: Active regulation of the epidermal growth factor receptor by the membrane bilayer
Source: eLife journal article supplement (doi:10.7554/elife.108789), 2025-10-13
Supplement: fig1-figsupp2-data5 [file elife-108789-fig1-figsupp2-data5-v1.pdf]

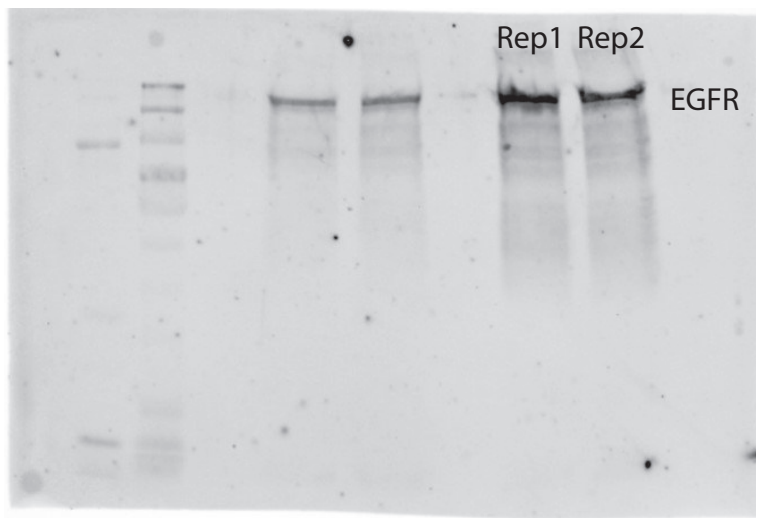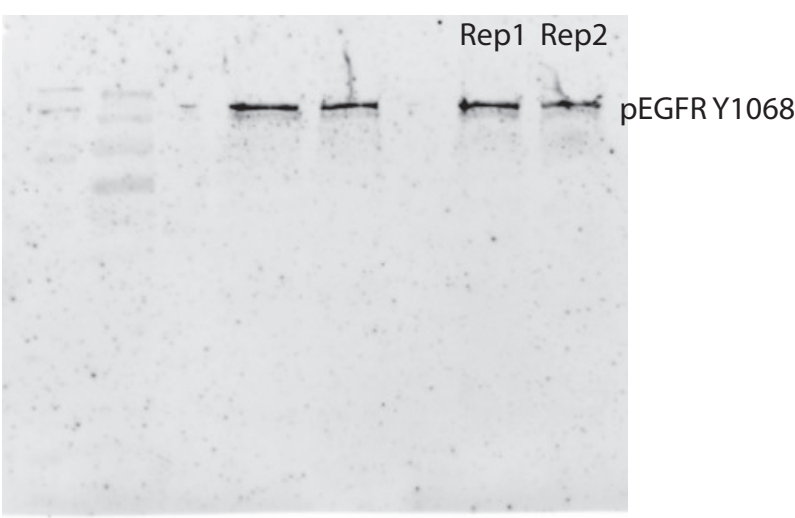

Figure 1, figure supplement 2d, Source Data 1. Original gels corresponding to Figure 1, figure supplement 2d.
