# Supplementary material for: Active regulation of the epidermal growth factor receptor by the membrane bilayer
Source: eLife journal article supplement (doi:10.7554/elife.108789), 2025-10-13
Supplement: supp1 [file elife-108789-supp1-v1.pdf]

| Sample condition 1  | Sample condition 2 | P-value | F     | Degrees of freedom |
|---------------------|--------------------|---------|-------|--------------------|
| 0 % anionic lipids  |                    |         |       |                    |
| EGFR, -EGF          | EGFR, +EGF         | < 0.001 | 49.4  | 875                |
| 30 % anionic lipids |                    |         |       |                    |
| EGFR, -EGF          | EGFR, +EGF         | < 0.001 | 108.8 | 863                |

**Table A. Statistical analysis of smFRET lifetime distributions.** Results from one-way analysis of variance (ANOVA) with P-value, F-statistic and degrees of freedom for all experimental pairs (experiment 1 and experiment 2 in the above table) from the distributions reported in Fig. 2j, k in the main text.

| Sample conditions   | Number of molecules | Number of bunches |
|---------------------|---------------------|-------------------|
| 0 % anionic lipids  |                     |                   |
| EGFR, -EGF          | 111                 | 448               |
| EGFR, +EGF          | 92                  | 428               |
| 30 % anionic lipids |                     |                   |
| EGFR, -EGF          | 95                  | 422               |
| EGFR, +EGF          | 111                 | 442               |

**Table B. Sample sizes for smFRET measurements.** The number of molecules and number of photon bunches used to construct the lifetime distributions are reported for all smFRET histograms from Fig. 2j, k in the main text.

| Sample condition 1            | Sample condition 2            | P-value | F      | Degrees of freedom |
|-------------------------------|-------------------------------|---------|--------|--------------------|
| 0 % POPS, 100 % DMPC;<br>-EGF | 0 % POPS, 100 % DMPC;<br>+EGF | < 0.001 | 911.3  | 1398               |
| 0 % POPS, 100 % POPC;<br>-EGF | 0 % POPS, 100 % POPC;<br>+EGF | < 0.001 | 204.48 | 757                |
| 15 % POPS, 85 % POPC;<br>-EGF | 15 % POPS, 85 % POPC;<br>+EGF | < 0.001 | 104.87 | 850                |
| 30 % POPS, 70 % POPC;<br>-EGF | 30 % POPS, 70 % POPC;<br>+EGF | < 0.001 | 540.13 | 1686               |
| 60 % POPS, 40 % POPC;<br>-EGF | 60 % POPS, 40 % POPC;<br>+EGF | 0.7512  | 0.1    | 1193               |

**Table C. Statistical analysis of smFRET lifetime distributions.** Results from one-way analysis of variance (ANOVA) with P-value, F-statistic and degrees of freedom for all experimental pairs (experiment 1 and experiment 2 in the above table) from the distributions reported in Fig. 3b in the main text and Supplementary Fig. 17.

| Sample conditions                | Number of molecules | Number of bunches |
|----------------------------------|---------------------|-------------------|
| 0 % POPS, 100 % DMPC; -EGF       | 51                  | 702               |
| 0 % POPS, 100 % DMPC; +EGF       | 53                  | 697               |
| 0 % POPS, 100 % DMPC; donor-only | 77                  | 992               |
| 0 % POPS, 100 % POPC; -EGF       | 74                  | 422               |
| 0 % POPS, 100 % POPC; +EGF       | 75                  | 336               |
| 0 % POPS, 100 % POPC; donor-only | 122                 | 1254              |
| 15 % POPS, 85 % POPC; -EGF       | 87                  | 490               |
| 15 % POPS, 85 % POPC; +EGF       | 76                  | 361               |
| 15 % POPS, 85 % POPC; donor-only | 107                 | 665               |
| 30 % POPS, 70 % POPC; -EGF       | 155                 | 891               |
| 30 % POPS, 70 % POPC; +EGF       | 118                 | 796               |
| 30 % POPS, 70 % POPC; donor-only | 59                  | 551               |
| 60 % POPS, 40 % POPC; -EGF       | 150                 | 723               |
| 60 % POPS, 40 % POPC; +EGF       | 71                  | 471               |
| 60 % POPS, 40 % POPC; donor-only | 113                 | 488               |

**Table D. Sample sizes for smFRET measurements.** The number of molecules and number of photon bunches used to construct the lifetime distributions are reported for all smFRET histograms from Fig. 3b in the main text and Supplementary Fig. 17.

(a) Two-Gaussian model:

|            |         |
|------------|---------|
| $\mu_1$    | 1.33 ns |
| $\sigma_1$ | 0.34 ns |
| $\mu_2$    | 2.71 ns |
| $\sigma_2$ | 0.67 ns |

(b) Three-Gaussian model:

|            |         |
|------------|---------|
| $\mu_1$    | 1.38 ns |
| $\sigma_1$ | 0.36 ns |
| $\mu_2$    | 2.64 ns |
| $\sigma_2$ | 0.45 ns |
| $\mu_3$    | 3.43 ns |
| $\sigma_3$ | 0.64 ns |

(c) BIC analysis and Ashman's D analysis for two-gaussian model:

|            |           |
|------------|-----------|
| Likelihood | -10468.93 |
| BIC        | 20983.64  |
| D12        | 2.60      |

(d) BIC analysis and Ashman's D analysis for three-gaussian model:

|            |           |
|------------|-----------|
| Likelihood | -10190.78 |
| BIC        | 20454.82  |
| D12        | 3.09      |
| D13        | 3.95      |
| D23        | 1.43      |

**Table E. Supplementary Table 1. Model selection and statistical analysis of global fits.** Comparison of two- and three-Gaussian models used to globally fit the lifetime distributions across all experimental conditions. Parameters ( $\mu$ ,  $\sigma$ ) correspond to the mean and standard deviation of each Gaussian component, respectively. Likelihood, Bayesian Information Criterion (BIC), and Ashman's D values are reported for assessing model quality and separation of components. The number of free parameters is 5 for the two-Gaussian model and 8 for the three-Gaussian model. The number of single-molecule photon bunches = 9,483 across all 18 conditions (lipid composition and  $\pm$ EGF).

| Sample conditions          | Compact state        | Open state        |
|----------------------------|----------------------|-------------------|
| 0 % POPS, 100 % DMPC; -EGF | 5.4 % [3.8 %, 6.9 %] | 95 % [93 %, 96 %] |
| 0 % POPS, 100 % DMPC; +EGF | 58 % [54 %, 62 %]    | 42 % [38 %, 46 %] |
| 0 % POPS, 100 % POPC; -EGF | 13 % [10 %, 16 %]    | 87 % [84 %, 90 %] |
| 0 % POPS, 100 % POPC; +EGF | 40 % [34 %, 46 %]    | 60 % [54 %, 66 %] |
| 15 % POPS, 85 % POPC; -EGF | 31 % [25%, 37 %]     | 69 % [63 %, 75 %] |
| 15 % POPS, 85 % POPC; +EGF | 8.8 % [8.7 %, 9.0 %] | 91 % [91 %, 91 %] |
| 30 % POPS, 70 % POPC; -EGF | 26 % [19 %, 33 %]    | 74 % [67 %, 81 %] |
| 30 % POPS, 70 % POPC; +EGF | 4.0 % [3.4 %, 4.6 %] | 96 % [95 %, 97 %] |
| 60 % POPS, 40 % POPC; -EGF | 6.3 % [5.2 %, 7.4 %] | 94 % [93 %, 95 %] |
| 60 % POPS, 40 % POPC; +EGF | 2.1 % [1.2 %, 2.9 %] | 98 % [97 %, 99 %] |

**Table F. Amplitude of compact and open state of the EGFR intracellular domain from smFRET lifetime distributions in main text Fig. 3b.** The numbers in parenthesis indicates the error bar indicated in Fig. 3g.

| Sample condition 1                         | Sample condition 2                         | P-value | F    | Degrees of freedom |
|--------------------------------------------|--------------------------------------------|---------|------|--------------------|
| 92.5 % POPC,<br>7.5 % Cholesterol;<br>-EGF | 92.5 % POPC,<br>7.5 % Cholesterol;<br>+EGF | 0.91    | 0.01 | 975                |
| 80 % POPC,<br>20 % Cholesterol;<br>-EGF    | 80 % POPC,<br>20 % Cholesterol;<br>+EGF    | 0.8245  | 0.05 | 600                |

**Table G. Statistical analysis of smFRET lifetime distributions.** Results from one-way analysis of variance (ANOVA) with P-value, F-statistic and degrees of freedom for all experimental pairs (experiment 1 and experiment 2 in the above table) from the distributions reported in Fig. 3d in the main text.

| Sample conditions                          | Number of molecules | Number of bunches |
|--------------------------------------------|---------------------|-------------------|
| 92.5 % POPC, 7.5 % Cholesterol; -EGF       | 71                  | 596               |
| 92.5 % POPC, 7.5 % Cholesterol; +EGF       | 59                  | 380               |
| 92.5 % POPC, 7.5 % Cholesterol; donor-only | 58                  | 1255              |
| 80 % POPC, 20 % Cholesterol; -EGF          | 62                  | 315               |
| 80 % POPC, 20 % Cholesterol; +EGF          | 58                  | 286               |
| 80 % POPC, 20 % Cholesterol; donor-only    | 48                  | 601               |

**Table H. Sample sizes for smFRET measurements.** The number of molecules and number of photon bunches used to construct the lifetime distributions are reported for all smFRET histograms from Fig. 3d in the main text.

| Sample conditions                       | Compact state        | Open state        |
|-----------------------------------------|----------------------|-------------------|
| 92.5 % POPC,<br>7.5 % Cholesterol; -EGF | 11 % [8.7 %, 13 %]   | 89 % [87 %, 91 %] |
| 92.5 % POPC,<br>7.5 % Cholesterol; +EGF | 10 % [7.2 %, 12 %]   | 90 % [88 %, 93 %] |
| 80 % POPC,<br>20 % Cholesterol; -EGF    | 4.6 % [3.9 %, 5.4 %] | 95 % [95 %, 96 %] |
| 80 % POPC,<br>20 % Cholesterol; +EGF    | 6.0 % [5.1 %, 6.9 %] | 94 % [93 %, 95 %] |

**Table I. Amplitude of compact and open state of the EGFR intracellular domain from smFRET lifetime distributions in main text Fig. 3d.** The numbers in parenthesis indicates the error bar indicated in Fig. 3g.

| Sample condition 1                                       | Sample condition 2                                       | P-value | F    | Degrees of freedom |
|----------------------------------------------------------|----------------------------------------------------------|---------|------|--------------------|
| 62.5 % POPC,<br>30 % POPS,<br>7.5 % Cholesterol,<br>-EGF | 62.5 % POPC,<br>30 % POPS,<br>7.5 % Cholesterol,<br>+EGF | 0.61    | 0.27 | 1203               |
| 50 % POPC,<br>30 % POPS,<br>20 % Cholesterol,<br>-EGF    | 50 % POPC,<br>30 % POPS,<br>20 % Cholesterol,<br>+EGF    | 0.002   | 9.88 | 794                |

**Table J. Statistical analysis of smFRET lifetime distributions.** Results from one-way analysis of variance (ANOVA) with P-value, F-statistic and degrees of freedom for all experimental pairs (experiment 1 and experiment 2 in the above table) from the distributions reported in Fig. 3f in the main text.

| Sample conditions                                        | Number of molecules | Number of bunches |
|----------------------------------------------------------|---------------------|-------------------|
| 62.5 % POPC, 30 % POPS, 7.5 % Cholesterol;<br>-EGF       | 42                  | 489               |
| 62.5 % POPC, 30 % POPS, 7.5 % Cholesterol;<br>+EGF       | 55                  | 715               |
| 62.5 % POPC, 30 % POPS, 7.5 % Cholesterol;<br>donor-only | 75                  | 783               |
| 50 % POPC, 30 % POPS, 20 % Cholesterol;<br>-EGF          | 81                  | 390               |
| 50 % POPC, 30 % POPS, 20 % Cholesterol;<br>+EGF          | 71                  | 405               |
| 50 % POPC, 30 % POPS, 20 % Cholesterol;<br>donor-only    | 66                  | 877               |

**Table K. Sample sizes for smFRET measurements.** The number of molecules and number of photon bunches used to construct the lifetime distributions are reported for all smFRET histograms from Fig. 3f in the main text.

| Sample conditions                                  | Compact state        | Open state           |
|----------------------------------------------------|----------------------|----------------------|
| 62.5 % POPC, 30 % POPS,<br>7.5 % Cholesterol, -EGF | 0.0 % [0.0 %, 0.0 %] | 100 % [100 %, 100 %] |
| 62.5 % POPC, 30 % POPS,<br>7.5 % Cholesterol, +EGF | 5.9 % [4.8 %, 7.0 %] | 94 % [93 %, 95 %]    |
| 50 % POPC, 30 % POPS,<br>20 % Cholesterol, -EGF    | 0 % [0 %, 0 %]       | 100 % [100 %, 100 %] |
| 50 % POPC, 30 % POPS,<br>20 % Cholesterol, +EGF    | 0.9 % [0.8 %, 1.0 %] | 99 % [99 %, 99 %]    |

**Table L. Amplitude of compact and open state of the EGFR intracellular domain from smFRET lifetime distributions in main text Fig. 3f.** The numbers in parenthesis indicates the error bar indicated in Fig. 3g.

| Antibody name                                                                      | Target                             | Host                   | Company                     | Clone      | Dilution |
|------------------------------------------------------------------------------------|------------------------------------|------------------------|-----------------------------|------------|----------|
| Anti-EGFR Antibody<br>(A-10)                                                       | EGFR<br>C-terminal                 | MouseIgG <sub>2a</sub> | Santa Cruz<br>Biotechnology | Monoclonal | 1:200    |
| Human Phospho-EGFR<br>Y1068 Antibody                                               | EGFR<br>phosphorylated<br>at Y1068 | MouseIgG <sub>2a</sub> | R&D Systems                 | Monoclonal | 1:200    |
| Goat anti-Mouse<br>IgG (H+L) Highly Cross-<br>Adsorbed Antibody<br>Alexa Fluor 790 | Mouse                              | GoatIgG                | Thermo Fisher               | Polyclonal | 1:10000  |

**Table M. List of antibodies used to show phosphorylation of EGFR nanodiscs.**
